# Supplementary material
Source: publisher site journal article supplement (https://static.cambridge.org/content/id/urn:cambridge.org:id:article:S2040174419000527/resource/name/S2040174419000527supp001.docx)
Supplement: Supplementary file 1 [file S2040174419000527supp001.docx]

**Supplementary tables**

**Supplementary Table S1: Association between sitting height, leg length, relative leg length and 10-year cardiovascular disease risk among Ghanaians in Europe**

| **Model** | **Prevalence ratios (95% confident intervals)** | | | | | **P value for trend** | **PR per 1 SD increase** | **p-value** |
| --- | --- | --- | --- | --- | --- | --- | --- | --- |
| **Q1 (ref.)** | **Q2** | **Q3** | **Q4** | **Q5** |  |  |
| **MEN** |  |  |  |  |  |  |  |  |
| **Sitting height** |  | **PR (95% CI)** | **PR (95% CI)** | **PR (95% CI)** | **PR (95% CI)** |  |  |  |
| **“Elevated CVD risk”/total** | ***89/168*** | ***100/169*** | ***105/173*** | ***84/171*** | ***91/166*** |  |  |  |
| Crude | 1.00 | 1.10 [0.91, 1.32] | 1.12 [0.93, 1.35] | 0.92 [0.75, 1.13] | 1.02 [0.84, 1.25] | 0.559 | 0.98 [0.92, 1.05] | 0.606 |
| Model 1 | 1.00 | 1.15 [0.95, 1.31] | 1.14 [0.92, 1.37] | 0.94 [0.76, 1.16] | 1.06 [0.86, 1.30] | 0.480 | 0.99 [0.93, 1.06] | 0.841 |
| Model 2 | 1.00 | 1.09 [0.82, 1.31] | 1.05 [0.88, 1.26] | 0.91 [0.75, 1.11] | 0.97 [0.79, 1.19] | 0.105 | 0.96 [0.91, 1.04] | 0.366 |
| Model 3 | 1.00 | 1.11 [0.92, 1.32] | 1.07 [0.89, 1.29] | 0.94 [0.76, 1.16] | 1.00 [0.80, 1.26] | 0.322 | 0.98 [0.90, 1.07] | 0.677 |
| **Leg length** |  |  |  |  |  |  |  |  |
| **“Elevated CVD risk”/total** | ***107/175*** | ***107/175*** | ***99/168*** | ***78/167*** | ***100/170*** |  |  |  |
| Crude | 1.00 | 0.95 [0.79, 1.14] | **0.75 [0.61, 0.92]** | 0.85 [0.70, 1.02] | 0.96 [0.80, 1.14] | 0.291 | 0.98 [0.92, 1.04] | 0.451 |
| Model 1 | 1.00 | 0.98 [0.82, 1.17] | **0.77 [0.63, 0.94]** | 0.85 [0.71, 1.04] | 0.97 [0.82, 1.16] | 0.400 | 0.99 [0.93, 1.06] | 0.789 |
| Model 2 | 1.00 | 1.01 [0.86, 1.20] | **0.78 [0.64, 0.96]** | 0.83 [0.70, 1.00] | 0.94 [0.80, 1.14] | 0.222 | 0.98 [0.92, 1.05] | 0.629 |
| Model 3 | 1.00 | 1.02 [0.86, 1.22] | **0.80 [0.63, 0.99]** | 0.86 [0.69, 1.09] | 0.99 [0.76, 1.29] | 0.544 | 1.02 [0.92, 1.13] | 0.739 |
| **Relative leg length** |  |  |  |  |  |  |  |  |
| **“Elevated CVD risk”/total** | ***96/171*** | ***99/171*** | ***83/168*** | ***99/168*** | ***92/169*** |  |  |  |
| Crude | 1.00 | 1.03 [0.86, 1.24] | 0.89 [0.73, 1.09] | 1.05 [0.88, 1.26] | 0.97 [0.80, 1.17] | 0.840 | 0.99 [0.93, 1.05] | 0.779 |
| Model 1 | 1.00 | 1.02 [0.87, 1.23] | 0.88 [0.72, 1.08] | 1.04 [0.86, 1.25] | 0.99 [0.81, 1.19] | 0.992 | 0.99 [0.94, 1.06] | 0.877 |
| Model 2 | 1.00 | 1.05 [0.88, 1.25] | 0.91 [0.75, 1.11] | 1.09 [0.91, 1.31] | 0.99 [0.82, 1.18] | 0.970 | 1.00 [0.95, 1.06] | 0.947 |
| **WOMEN** |  |  |  |  |  |  |  |  |
| **Sitting height** |  |  |  |  |  |  |  |  |
| **“Elevated CVD risk”/total** | ***68/226*** | ***49/220*** | ***40/217*** | ***44/219*** | ***40/220*** |  |  |  |
| Crude | 1.00 | **0.73 [0.53, 1.00]** | **0.63 [0.45, 0.88]** | **0.65 [0.47, 0.91]** | **0.60 [0.42, 0.84]** | **0.003** | **0.82 [0.72, 0.93]** | **0.002** |
| Model 1 | 1.00 | 0.74 [0.54, 1.02] | **0.62 [0.44, 0.87]** | **0.71 [0.50, 0.99]** | **0.66 [0.46, 0.95]** | **0.028** | **0.85 [0.75, 0.97]** | **0.019** |
| Model 2 | 1.00 | 0.74 [0.54, 1.02] | **0.62 [0.44, 0.87]** | **0.69 [0.49, 0.98]** | **0.66 [0.46, 0.95]** | **0.025** | **0.85 [0.74, 0.99]** | **0.033** |
| Model 3 | 1.00 | 0.78 [0.56, 1.09] | **0.65 [0.48, 0.93]** | **0.69 [0.48, 0.98]** | **0.68 [0.47, 0.98]** | 0.**034** | **0.85 [0.74, 0.99]** | **0.032** |
| Model 4 | 1.00 | 0.78 [0.55, 1.10] | **0.65 [0.44, 0.96]** | 0.68 [0.45, 1.03] | 0.68 [0.43, 1.06] | 0.080 | 0.86 [0.71, 1.04] | 0.127 |
| **Leg length** |  |  |  |  |  |  |  |  |
| **“Elevated CVD risk”/total** | ***58/222*** | ***48/224*** | ***45/221*** | ***46/217*** | ***44/218*** |  |  |  |
| Crude | 1.00 | 0.82 [0.59, 1.14] | 0.77 [0.55, 1.08] | 0.79 [0.56, 1.08] | 0.77 [0.54, 1.08] | 0.141 | 0.95 [0.84, 1.07] | 0.369 |
| Model 1 | 1.00 | 0.86 [0.62, 1.22] | 0.83 [0.59, 1.16] | 0.82 [0.58, 1.15] | 0.80 [0.56, 1.11] | 0.196 | 0.95 [0.84, 1.07] | 0.416 |
| Model 2 | 1.00 | 0.86 [0.61, 1.21] | 0.81 [0.57, 1.14] | 0.83 [0.57, 1.17] | 0.80 [0.56, 1.13] | 0.336 | 0.97 [0.84, 1.11] | 0.628 |
| Model 3 | 1.00 | 0.87 [0.62, 1.21] | 0.79 [0.55, 1.13] | 0.86 [0.60, 1.22] | 0.84 [0.57, 1.24] | 0.426 | 0.97 [0.85, 1.12] | 0.702 |
| Model 4 | 1.00 | 0.94 [0.66, 1.33] | 0.90 [0.59, 1.37] | 1.03 [0.64, 1.66] | 1.07[0.61, 1.88] | 0.725 | 1. 19 [0.95, 1.50] | 0.127 |
| **Relative leg length** |  |  |  |  |  |  |  |  |
| **“Elevated CVD risk”/total** | ***44/221*** | ***53/220*** | ***46/221*** | ***43/220*** | ***55/2220*** |  |  |  |
| Crude | 1.00 | 1.03 [0.95, 1.11] | 1.09 [0.76, 1.57] | 0.98 [0.67, 1.43] | 1.26 [0.88, 1.78] | 0.560 | 1.08 [0.96, 1.22] | 0.198 |
| Model 1 | 1.00 | 1.21 [0.84, 1.76) | 1.07 [0.74, 1.55] | 0.97 [0.66, 1.48] | 119 [0.84, 1.72] | 0.746 | 1.07 [0.94, 1.22] | 0.297 |
| Model 2 | 1.00 | 1.21 [0.93, 1.87] | 1.07 [0.74, 1.48] | 0.97 [0.66, 1.48] | 119 [0.83,, 1.71] | 0737 | 1.07 [0.94, 1.22] | 0.290 |
| Model 3 | 1.00 | 1.26 [0.99, 1.80] | 1.13 [0.78, 1.62] | 0.95 [0.64, 1.41] | 1.29 [0.89, 1.88] | 0.591 | 1.10 [0.95, 1.26] | 0.189 |

*PR, prevalence ratio; Ref, reference category*

*Men: Model 1: Adjusted for adult, parental education, age of migration; Model 2: Model 1 + body mass index, waist circumference, hip circumference; Model 3: Model 2 + adult height.*

*Women: Model 1: Adjusted for adult, parental education, age of migration; Model 2: Model 1 + age at menarche; Model 3: Model 2 + body mass index, waist circumference, hip circumference; model 4: model 3 + adult height.*

**Supplementary Table S2: Association between sitting height, leg length, relative leg length and 10-year cardiovascular disease risk among Ghanaians in urban Ghana**

| **Model** | **Prevalence ratios (95% confident intervals)** | | | | | **P value for trend** | **PR per 1 score SD** | **p-value** |
| --- | --- | --- | --- | --- | --- | --- | --- | --- |
| **Q1 (ref.)** | **Q2** | **Q3** | **Q4** | **Q5** |  |  |
| **MEN** |  |  |  |  |  |  |  |  |
| **Sitting height** |  | **PR (95% CI)** | **PR (95% CI)** | **PR (95% CI)** | **PR (95% CI)** |  |  |  |
| ***“Elevated CVD risk”/total*** | ***25/45*** | ***22/45*** | ***20/45*** | ***21/45*** | ***13/44*** |  |  |  |
| Crude | 1.00 | 0.88 [0.59, 1.31] | 0.80 [0.53, 1.22] | 0.84 [0.56, 1.26] | **0.53 [0.31, 0.90]** | **0.021** | **0.82 [0.71, 0.95]** | **0.008** |
| Model 1 | 1.00 | 0.88 [0.58, 1.32] | 0.79 [0.52, 1.21] | 0.80 [0.53, 1.21] | **0.50 [0.30, 0.85]** | **0.009** | **0.83 [0.72, 0.95]** | **0.009** |
| Model 2 | 1.00 | 0.86 [0.57, 1.28] | 0.77 [0.52, 1.15] | 0.75 [0.49, 1.15] | **0.49 [0.29, 0.83]** | **0.006** | **0.81 [0. 70, 0.94]** | **0.007** |
| Model 3 | 1.00 | 0.91 [0.60, 1.37] | 0.85 [0.54, 1.33] | 0.88 [0.53, 1.47] | 0.62 [0.32, 1.21] | **0.224** | **0.89 [0.71, 1.12]** | **0.323** |
| **Leg length** |  |  |  |  |  |  |  |  |
| ***“Elevated CVD risk”/total*** | ***23/45*** | ***23/45*** | ***21/45*** | ***15/46*** | ***19/43*** |  |  |  |
| Crude | 1.00 | 1.00 [0.67, 1.50] | 0.91 [0.60, 1.40] | 0.64 [0.38, 1.06] | 0.86 [0.56, 1.34] | 0.166 | 0.90 [0.78, 1.04] | 0.146 |
| Model 1 | 1.00 | 0.99 [0.66, 1.49]] | 0.93 [0.61, 1.44] | 0.63 [0.39, 1.03] | 0.89 [0.57, 1.40] | 0.180 | 0.91 [0.79, 1.05] | 0.193 |
| Model 2 | 1.00 | 1.00 [0.68, 1.49] | 0.87 [0.55, 1.37] | 0.66 [0.41, 1.08] | 0.82 [0.51, 1.31] | 0.131 | 0.89 [0.77, 1.03] | 0.107 |
| Model 3 | 1.00 | 1.16 [0.77, 1.74] | 1.20 [0.73, 1.98] | 1.15 [0.60, 2.23] | 1.83 [0.83, 3.91] | 0.293 | 1.24 [0.93, 1.65] | 0.141 |
| **Relative leg length** |  |  |  |  |  |  |  |  |
| ***“Elevated CVD risk”/total*** | ***22/45*** | ***17/45*** | ***18/45*** | ***22/45*** | ***22/44*** |  |  |  |
| Crude | 1.00 | 0.77 [0.48, 1.24] | 0.82 [0.51, 1.31] | 1.00 [0.65, 1.53] | 1.02 [0.67, 1.56] | 0.578 | 1.03 [0.89, 1.20] | 0.633 |
| Model 1 | 1.00 | 0.75 [0.47, 1.21] | 0.79 [0.50, 1.26] | 1.07 [0.71, 1.61] | 1.07 [0.69, 1.66] | 0.421 | 1.07 [0.92, 1.25] | 0.384 |
| Model 2 | 1.00 | 0.73 [0.46, 1.17] | 0.84 [0.52, 1.35] | 1.05 [0.70, 1.59] | 1.02 [0.64, 1.64] | 0.489 | 1.06 [0.90, 1.24] | 0.474 |
| **WOMEN** |  |  |  |  |  |  |  |  |
| ***Sitting height*** |  |  |  |  |  |  |  |  |
| ***“Elevated CVD risk”/total*** | ***38/106*** | ***25/107*** | ***13/100*** | ***18/106*** | ***21/102*** |  |  |  |
| Crude | 1.00 | **0.65 [0.42, 1.00]** | **0.39 [0.22, 0.67]** | **0.50 [0.31, 0.80]** | **0.57 [0.36, 0.91]** | **0.008** | **0.72 [0.59, 0.87]** | **0.001** |
| Model 1 | 1.00 | **0.66 [0.43, 1.00]** | **0.38 [0.22, 0.66]** | 0.51 [0.32, 0.82] | **0.61 [0.38, 0.97]** | **0.015** | **0.73 [0.60, 0.89]** | **0.002** |
| Model 2 | 1.00 | **0.65 [0.43, 1.00]** | **0.36 [0.20, 0.63]** | 0.49 [0.30, 0.80] | **0.61 [0.38, 0.97]** | **0.014** | **0.73 [0.60, 0.89]** | **0.002** |
| Model 2 | 1.00 | 0.78 [0.51, 1.20] | **0.46 [0.26, 0.81]** | **0.62 [0.38, 1.00]** | 0.84 [0.51, 1.40] | 0.174 | **0.80 [0.65, 0.99]** | **0.038** |
| Model 3 | 1.00 | 0.79 [0.51, 1.22] | **0.48 [0.27, 0.85]** | 0.64 [0.37, 1.12] | 0.91 [0.44, 1.88] | 0.349 | 0.87 [0.65, 1.18] | 0.296 |
| **Leg length** |  |  |  |  |  |  |  |  |
| ***“Elevated CVD risk”/total*** | ***25/105*** | ***25/106*** | ***22/102*** | ***25/104*** | ***18/104*** |  |  |  |
| Crude | 1.00 | 0.99 [0.61, 1.61] | 0.94 [0.57, 1.54] | 1.04 [0.64, 1.68] | 0.73 [0.42, 1.25] | 0.352 | 0.93 [0.81, 1.06] | 0.256 |
| Model 1 | 1.00 | 0.97 [0.60, 1.58] | 0.91 [0.56, 1.49] | 1.06 [0.67, 1.70] | 0.73 [0.42, 1.23 | 0.200 | 0.91 [0.80, 1.05] | 0.207 |
| Model 2 | 1.00 | 0.96 [0.59, 1.57] | 0.87 [0.53, 1.44] | 1.03 [0.64, 1.65] | 0.71 [0.41, 1.22] | 0.316 | 0.91 [0.79, 1.04] | 0.164 |
| Model 3 | 1.00 | 0.96 [0.60, 1.53] | 0.90 [0.56, 1.45] | 1.00 [0.62, 1.60] | 0.76 [0.44, 1.34] | 0.135 | 0.90 [0.77, 1.06] | 0.282 |
| Model 4 | 1.00 | 1.01 [0.62, 1.65] | 1.03 [0.58, 1.81] | 1.21 [0.64, 2.73] | 1.02 [0.42, 2.47] | 0.573 | 1.18 [0.85, 1.68] | 0.296 |
| **Relative leg length** |  |  |  |  |  |  |  |  |
| ***“Elevated CVD risk”/total*** | ***14/105*** | ***27/104*** | ***26/104*** | ***27/104*** | ***21/104*** |  |  |  |
| Crude | 1.00 | **2.00 [1.12, 3.58]** | **1.88 [1.04, 3.39]** | **2.00 [1.12, 3.58]** | 1.51 [0.81, 2.82] | **0.**254 | 1.14 [0.96, 1.36] | 0.133 |
| Model 1 | 1.00 | **1.95 [1.09, 3.49]** | **1.80 [1.00, 3.24]** | **1.92 [1.07, 3.45]** | 1.46 [0.78, 2.75] | **0.**338 | 1.13 [0.93, 1.36] | 0.214 |
| Model 2 | 1.00 | **1.89 [1.05, 3.39]** | **1.79 [1.00, 3.23]** | **1.86 [1.03, 3.37]** | 1.43, 0.76, 2.71] | 0.364 | 1.12 [0.92, 1.35] | 0.251 |
| Model 3 | 1.00 | 1.77 [0.99, 3.18] | 1.65 [0.90, 3.01] | 1.73 [0.96, 3.15] | 1.24 [0.64, 2.41] | 0.722 | 1.06 [0.88, 1.29] | 0.540 |

*PR, prevalence ratio; Ref, reference category*

*Men: Model 1: Adjusted for adult and parental education; Model 2: Model 1+ body mass index, waist circumference, hip circumference; Model 3: model 2 + adult height.*

*Women: Model 1: Adjusted for adult and parental education; Model 2: Model 1+ age at menarche; Model 3: Model 2+ body mass index, waist circumference, hip circumference;*

*Model 4: model 3 + adult height.*

**Supplementary Table S3: Association between sitting height, leg length, relative leg length and 10-year cardiovascular disease risk among Ghanaians in rural Ghana**

| **Model** | **Prevalence ratios (95% confident intervals)** | | | | | **P value for trend** | **Per 1 SD increase** | **p-value** |
| --- | --- | --- | --- | --- | --- | --- | --- | --- |
| **Q1 (ref.)** | **Q2** | **Q3** | **Q4** | **Q5** |  |  |
| **MEN** |  |  |  |  |  |  |  |  |
| **Sitting height** |  | **PR (95% CI)** | **PR (95% CI)** | **PR (95% CI)** | **PR (95% CI)** |  |  |  |
| ***“Elevated CVD risk”/total*** | ***21/44*** | ***14/43*** | ***16/44*** | ***19/43*** | ***19/43*** |  |  |  |
| Crude | 1.00 | 0.68 [0.40, 1.16] | 0.76 [0.46, 1.26] | 0.93 [0.59, 1.46] | **0.44 [0.23, 0.85]** | 0.064 | **0.82 [0.70, 0.95]** | 0.032 |
| Model 1 | 1.00 | 0.68 [0.40, 1.13] | 0.77 [0.48, 1.24] | 1.06 [0.67, 1.69] | **0.49 [0.25, 0.96]** | 0.217 | 0.86 [0.72, 1.03] | 0.068 |
| Model 2 | 1.00 | 0.80 [0.46, 1.38] | 0.74 [0.44, 1.22] | 1.01 [0.62, 1.65] | **0.49 [0.25, 0.95]** | 0.124 | 0.83 [0.73, 1.04] | 0.116 |
| Model 3 | 1.00 | 0.81 [0.47, 1.41] | 0.77 [0.45, 1.34] | 1.09 [0.60, 1.99] | **0.56 [0.24, 1.30]** | 0.595 | 0.96 [0.71, 1.28] | 0.785 |
| **Leg length** |  |  |  |  |  |  |  |  |
| ***“Elevated CVD risk”/total*** | ***13/44*** | ***18/44*** | ***17/43*** | ***18/43*** | ***13/43*** |  |  |  |
| Crude | 1.00 | 1.38 [0.78, 2.47] | 1.34 [0.74, 2.41] | 1.42 [0.80, 2.52] | 1.02 [0.54, 1.95] | 0.936 | 1.00 [0.85, 1.18] | 0.979 |
| Model 1 | 1.00 | 1.39 [0.79, 2.43] | 1.28 [0.74, 2.26] | 1.43 [0.82, 2.52] | 1.13 [0.61, 2.12] | 0.768 | 1.04 [0.88, 1.24] | 0.654 |
| Model 2 | 1.00 | 1.26 [0.73, 2.18] | 1.07 [0.61, 1.90] | 0.93 [0.51, 1.70] | 0.74 [0.38, 1.44] | 0.171 | 0.87 [0.71, 1.07] | 0.179 |
| Model 3 | 1.00 | 1.28 [0.74, 2.22] | 1.14 [0.63, 2.09] | 1.05 [0.51, 2.15] | 0.91 [0.37, 2.25] | 0.886 | 1.05 [0.72, 1.52] | 0.809 |
| **Relative leg length** |  |  |  |  |  |  |  |  |
| ***“Elevated CVD risk”/total*** | ***12/44*** | ***14/43*** | ***15/44*** | ***19/43*** | ***19/43*** |  |  |  |
| Crude | 1.00 | 1.19 [0.62, 2.28] | 1.25 [0.66, 2.36] | 1.62 [0.90, 2.92] | 1.62 [0.90, 2.92] | 0.050 | 1.18 [0.99, 1.42] | 0.070 |
| Model 1 | 1.00 | 1.13 [0.59, 2.17] | 1.18 [0.63, 2.22] | 1.48 [0.84, 2.62] | 1.65 [0.93, 2.91] | 0.046 | 1.20 [0.99, 1.45] | 0.060 |
| Model 2 | 1.00 | 0.97 [0.52, 1.80] | 1.03 [0.56, 1.90] | 1.20 [0.68, 2.12] | 1.07 [0.59, 1.92] | 0.549 | 1.02 [0.83, 1.25] | 0.834 |
| **WOMEN** |  |  |  |  |  |  |  |  |
| **Sitting height** |  |  |  |  |  |  |  |  |
| ***“Elevated CVD risk”/total*** | ***28/68*** | ***13/68*** | ***15/68*** | ***12/68*** | ***13/68*** |  |  |  |
| Crude | 1.00 | **0.46 [0.26, 0.82]** | **0.54 [0.32, 0.91]** | **0.43 [0.24, 0.77]** | **0.47 [0.27, 0.83]** | **0.009** | **0.73 [0.62, 0.87]** | **<0.001** |
| Model 1 | 1.00 | **0.50 [0.29, 0.87]** | **0.57 [0.34, 0.96]** | **0.47 [0.26, 0.83]** | **0.50 [0.29, 0.87]** | **0.012** | **0.76 [0.65, 0.90]** | **0.001** |
| Model 2 | 1.00 | **0.50 [0.29, 0.87]** | **0.56 [0.33, 0.94]** | **0.46 [0.26, 0.82]** | **0.50 [0.29, 0.87]** | **0.012** | **0.76 [0.64, 0.90]** | **0.002** |
| Model 3 | 1.00 | **0.52 [0.30, 0.91]** | **0.54 [0.32, 0.92]** | **0.46 [0.26, 0.81]** | **0.44 [0.25, 0.78]** | **0.005** | **0.73 [0.60, 0.87]** | **0.001** |
| Model 4 | 1.00 | **0.52 [0.30, 0.91]** | **0.55 [0.32, 0.96]** | **0.47 [0.26, 0.86]** | **0.45 [0.23, 0.91]** | **0.012** | **0.72 [0.58, 0.90]** | **0.005** |
| **Leg length** |  |  |  |  |  |  |  |  |
| ***“Elevated CVD risk”/total*** | ***17/68*** | ***13/68*** | ***16/68*** | ***13/68*** | ***22/67*** |  |  |  |
| Crude | 1.00 | 0.76 [0.40, 1.45] | 0.94 [0.52, 1.71] | 0.76 [0.40, 1.45] | 1.31 [0.77, 2.45] | 0.911 | 1.05 [0.83, 1.33] | 0.671 |
| Model 1 | 1.00 | 0.82 [0.44, 1.53] | 0.92 [0.52, 1.65] | 0.71 [0.37, 1.35] | 1.29 [0.77, 2.17] | 0.653 | 1.03 [0.83, 1.26] | 0.802 |
| Model 2 | 1.00 | 0.82 [0.44, 1.54] | 0.92 [0.52, 1.65] | 0.71 [0.37, 1.35] | 1.29 [0.77, 2.17] | 0.517 | 1.02 [0.83, 1.26] | 0.828 |
| Model 3 | 1.00 | 0.78 [0.41, 1.47] | 0.85 [0.47, 1.53] | 0.58 [0.30, 1.13] | 0.99 [0.57, 1.70] | 0.227 | 0.95 [0.79, 1.15] | 0.592 |
| Model 4 | 1.00 | 0.85 [0.45, 1.60] | 1.04 [0.58, 1.89] | 0.90 [0.43, 1.87] | 1.85 [0.89, 3.81] | 0.168 | 1.16 [0.75, 1.79] | 0.460 |
| **Relative leg length** |  |  |  |  |  |  |  |  |
| ***“Elevated CVD risk”/total*** | ***12/68*** | ***14/68*** | ***11/68*** | ***20/68*** | ***24/67*** |  |  |  |
| Crude | 1.00 | 1.17 [0.58, 2.34] | 0.92 [0.43, 1.93] | 1.67 [0.88, 3.14] | **2.03 [1.11, 3.72]** | **0.008** | 1.20 [0.90, 1.61] | 0.210 |
| Model 1 | 1.00 | 1.07 [0.53, 2.13] | 0.88 [0.42, 1.81] | 1.54 [0.83, 2.88] | 1.78 [0.98, 3.23] | **0.020** | 1.15 [0.88, 1.52] | 0.310 |
| Model 2 | 1.00 | 1.06 [0.53, 2.11] | 0.86 [0.41, 1.79] | 1.52 [0.82, 2.85] | 1.76 [0.96, 3.20] | **0.022** | 1.15 [0.87, 1.52] | 0.323 |
| Model 3 | 1.00 | 0.96 [0.47, 1.96] | 0.80 [0.38, 1.69] | 1.35 [0.70, 2.58] | 1.48 [0.79, 2.78] | 0.083 | 1.09 [0.84, 1.41] | 0.523 |

*PR, prevalence ratio; Ref, reference category*

*Men: Model 1: Adjusted for adult and parental education; Model 2: Model 1+ body mass index, waist circumference, hip circumference; Model 3: model 2 + adult height.*

*Women: Model 1: Adjusted for adult and parental education; Model 2: Model 1+ age at menarche; Model 3: Model 2+ body mass index, waist circumference, hip circumference;*

*Model 4: model 3 + adult height.*
